# Supplementary material for: Drug combinations as effective anti-leishmanials against drug resistant Leishmania mexicana
Source: Royal Society of Chemistry journal article supplement (doi:10.1039/d0md00101e), 2020-01-01
Supplement: d0md00101e1.pdf [file d0md00101e1.pdf]

Supplementary Data for: Drug combinations are effective anti-leishmanials against drug resistant *Leishmania mexicana*.

Humera Ahmed, Charlotte R. Curtis, Sara Tur-Gracia, Toluwanimi O. Olatunji, Katharine C. Carter, Roderick A. M. Williams\*

Pages

- 2: Figure S1. Dose response curves of mixed APCs against *L. mexicana* WT
- 3: Figure S2. Dose response curves of mixed APCs against *L. mexicana* C12Rx
- 4: Figure S3. Dose response curves of mixed APC-KTZ against *L. mexicana* C12Rx
- 5: Figure S4. Dose response curves of mixed APC-Amp B against *L. mexicana* C12Rx

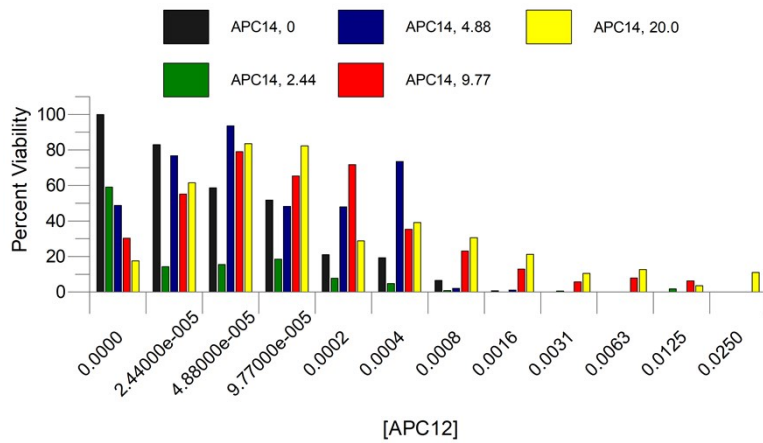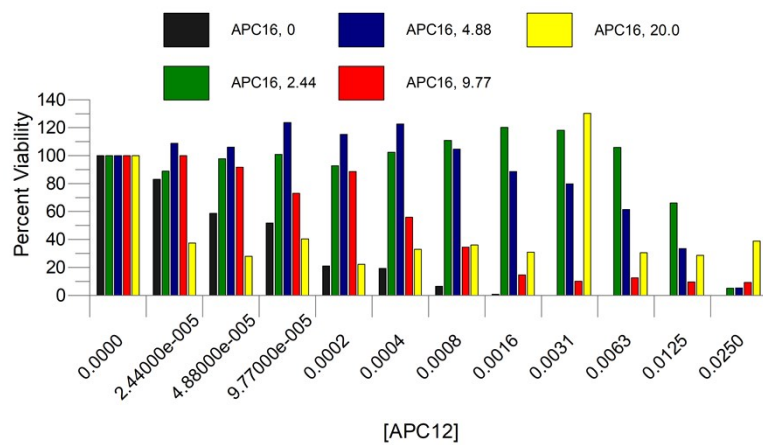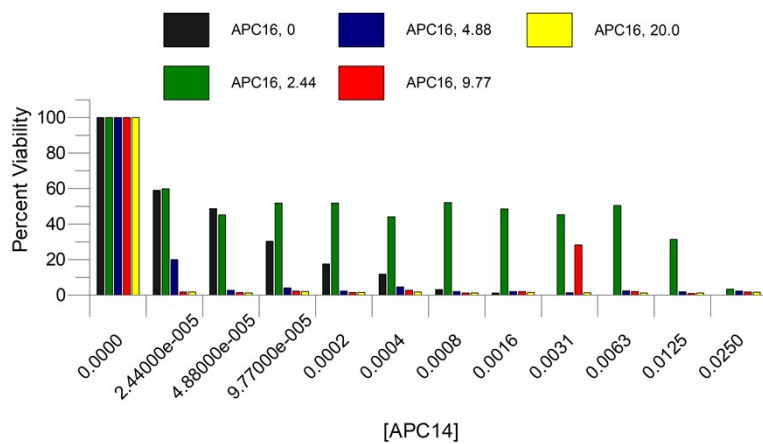

Figure S1. Dose response curves of mixed APCs against *L. mexicana* WT. The dose response curves of varied concentrations of APC12 ( $2.44 \times 10^{-5}$  -  $0.025 \mu\text{g/ml}$ ) with APC14 (top panel) or APC16 (middle panel) at 0, 2.44, 4.88, 9.77, 20.00  $\mu\text{g/ml}$ , and APC14 ( $2.44 \times 10^{-5}$  -  $0.025 \mu\text{g/ml}$ ) with APC16 (bottom panel, at 0, 2.44, 4.88, 9.77,

20.00  $\mu\text{g/ml}$ ) against *L. mexicana* WT promastigotes ( $1 \times 10^5$ ) treated for 72 hours after drug treatment. Cell viability was assessed using the luciferase assay at wavelength/ bandwidth, 545/40 nm. The effect of drug treatment on parasite survival was determined by determining the mean viability for experimental values compared to mean no drug control value. Compounds were tested using an n=3 and data are mean and standard deviations expressed as a percent of the control (parasites incubated with medium alone, n=6).

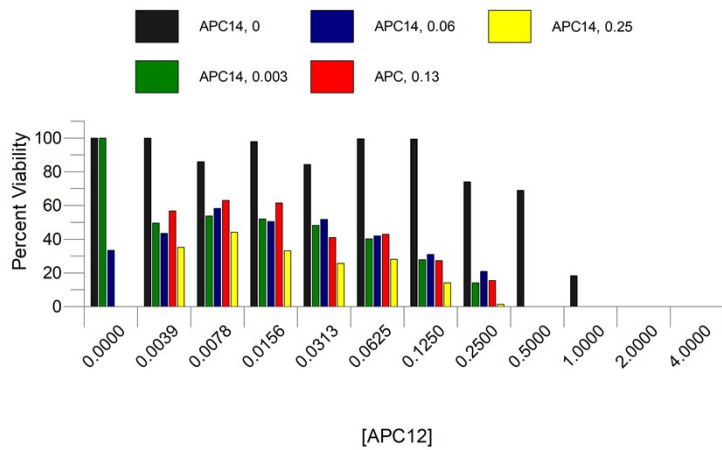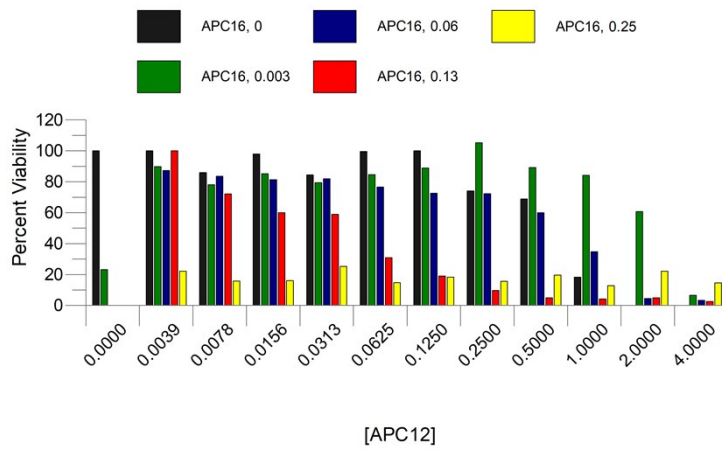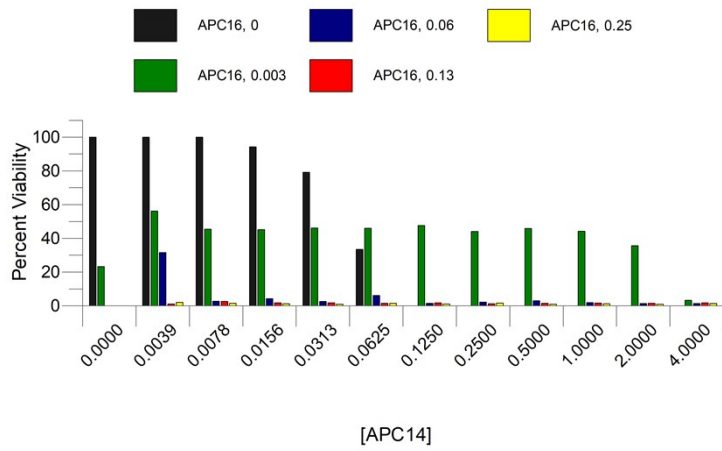

Figure S2. Dose response curves of mixed APCs. The dose response curves of varied concentrations of APC12 (0.003mg/ml to 4mg/ml) with APC14 (top panel) or APC16 (middle panel) at 0, 0.003, 0.06, 0.13, 0.25  $\mu\text{g/ml}$  and APC14 (0.003mg/ml to 4mg/ml) with APC16 at 0, 0.003, 0.06, 0.13, 0.25  $\mu\text{g/ml}$  against *L. mexicana* C12Rx promastigotes ( $1 \times 10^5$ ), resistant to the APC analogue, APC12 treated for 72 hours after drug treatment. Cell

viability was assessed using the luciferase assay at wavelength/ bandwidth, 545/40 nm. The effect of drug treatment on parasite survival was determined by determining the mean viability for experimental values compared to mean no drug control value. Compounds were tested using an n=3 and data are mean and standard deviations expressed as a percent of the control (parasites incubated with medium alone, n=6).

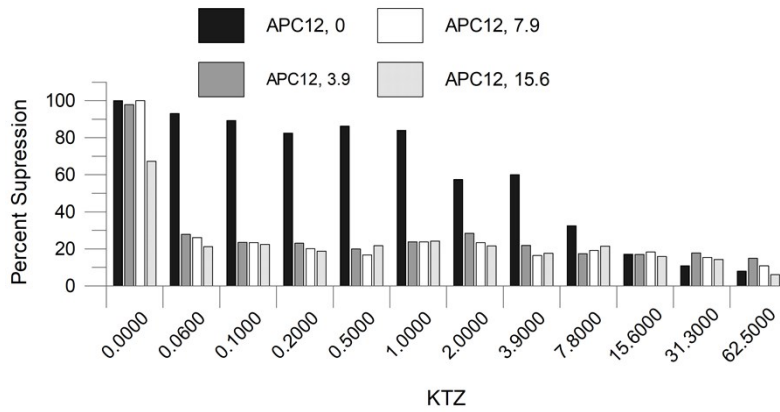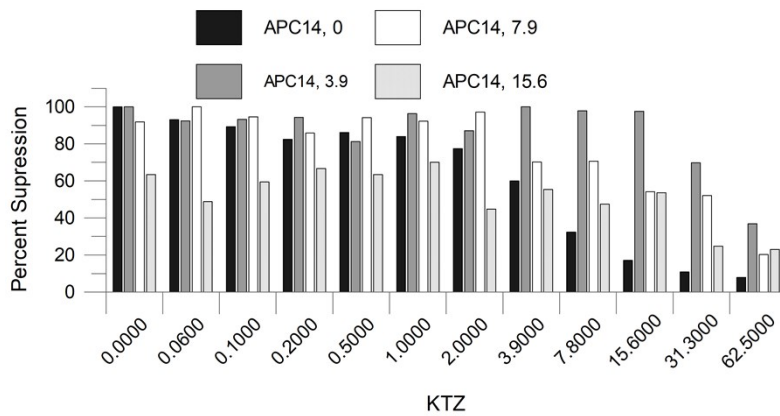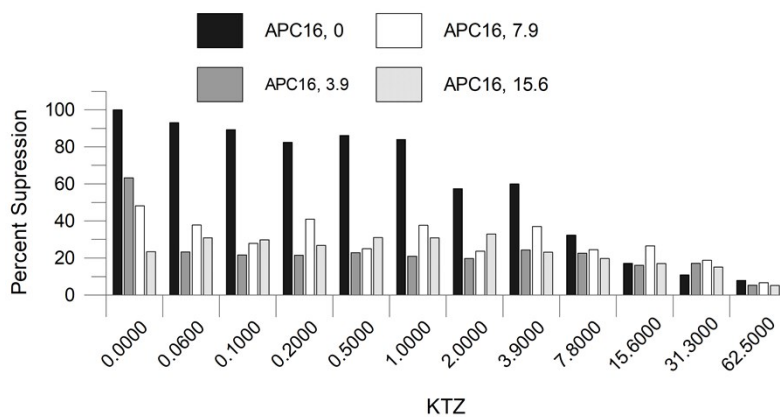

Figure S3. Dose response curves of mixed APCs-KTZ. The dose response curves of varied concentrations of KTZ (0.06-6.25 µg/ml) with APC12 (top panel), APC14 (middle panel) and APC16 (bottom panel) at 0, 3.9, 7.9 and 15.6 µg/ml against *L. mexicana* C12Rx promastigotes ( $1 \times 10^5$ ), resistant to the APC analogue, APC12 treated for 72 hours after drug treatment. Cell viability was assessed using the luciferase assay at wavelength/ bandwidth, 545/40 nm. The effect of drug treatment on parasite survival was determined by determining the mean viability for experimental values compared to mean no drug control value. Compounds were tested

using an n=3 and data are mean and standard deviations expressed as a percent of the control (parasites incubated with medium alone, n=6).

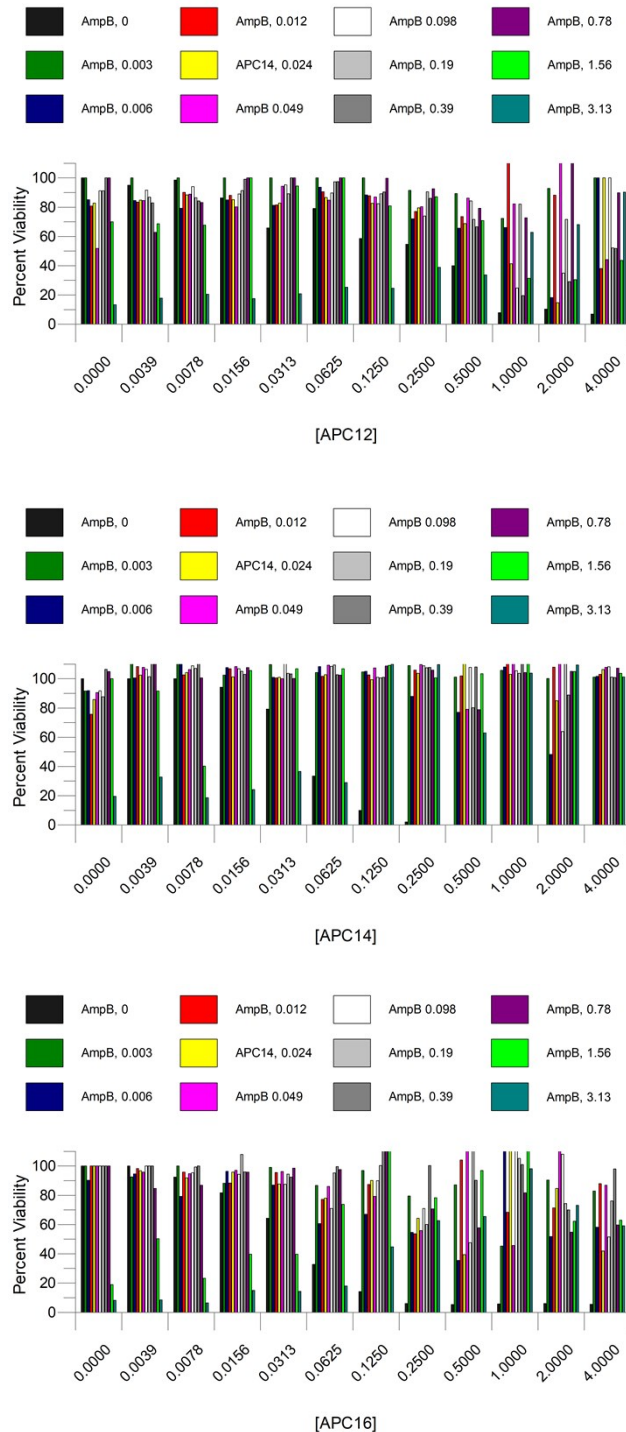

Figure S4. Dose response curves of mixed APCs-Amp B. The dose response curves of varied concentrations of APC12 (top panel), APC14 (middle panel) and APC16 (bottom panel) at 0.003mg/ml to 4mg/ml with AmpB 0, 0.003, 0.006, 0.012, 0.024, 0.049, 0.096, 0.19, 0.39, 0.78, 1.56 and 3.13  $\mu\text{g/ml}$  against *L. mexicana* C12Rx promastigotes ( $1 \times 10^5$ ), resistant to the APC analogue, APC12 treated for 72 hours after drug treatment. Cell viability was assessed using the luciferase assay at wavelength/ bandwidth, 545/40 nm. The effect of drug treatment on parasite survival was determined by determining the mean viability for experimental values compared to mean no drug control value. Compounds were tested using an n=3 and data are mean and standard deviations expressed as a percent of the control (parasites incubated with medium alone, n=6).
